# Supplementary material for: Single cell analysis of spondyloarthritis regulatory T cells identifies distinct synovial gene expression patterns and clonal fates
Source: PubMed Central journal article supplement (PMC8671562; doi:10.1038/s42003-021-02931-3), 2021-12-14
Supplement: 42003_2021_2931_MOESM1_ESM.pdf [file 42003_2021_2931_MOESM1_ESM.pdf]

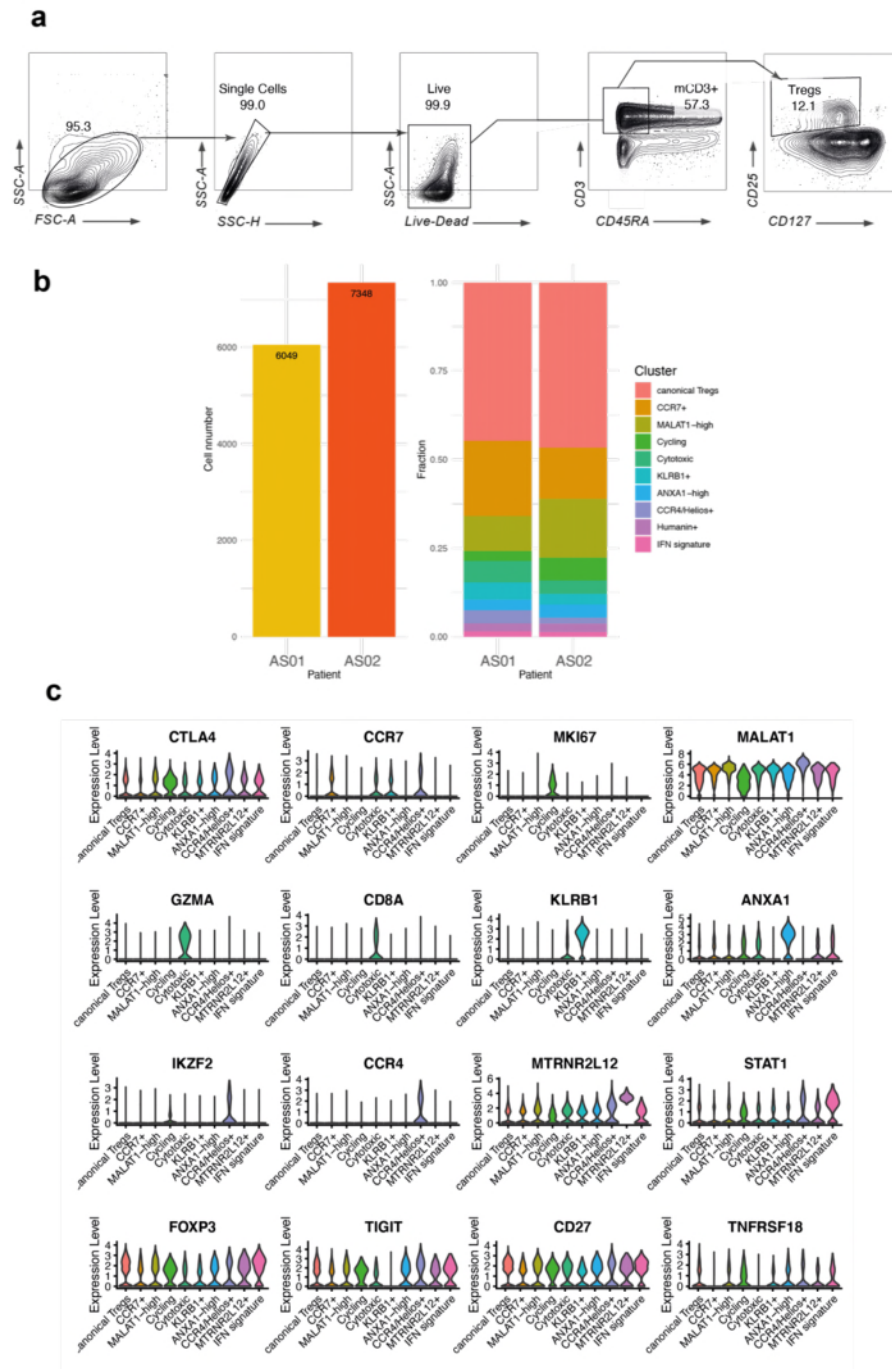

**Supplementary Figure 1. Treg sorting strategy, patient contribution to Treg clusters and expression of cluster-characterising genes. (a)** Gating strategy used to sort memory Tregs (live CD3<sup>+</sup>CD45RA<sup>-</sup>CD25<sup>+</sup> CD127<sup>low</sup>) from peripheral blood and synovial fluid mononuclear cells prior to single cell 10x 5<sup>′</sup> RNA sequencing. **(b)** Patient contribution to the AS dataset and cluster make up in each patient. **(c)** Violin plots showing differential distribution of selected genes (shown normalised expression, log(UMI+1)) used to assist cluster annotation.

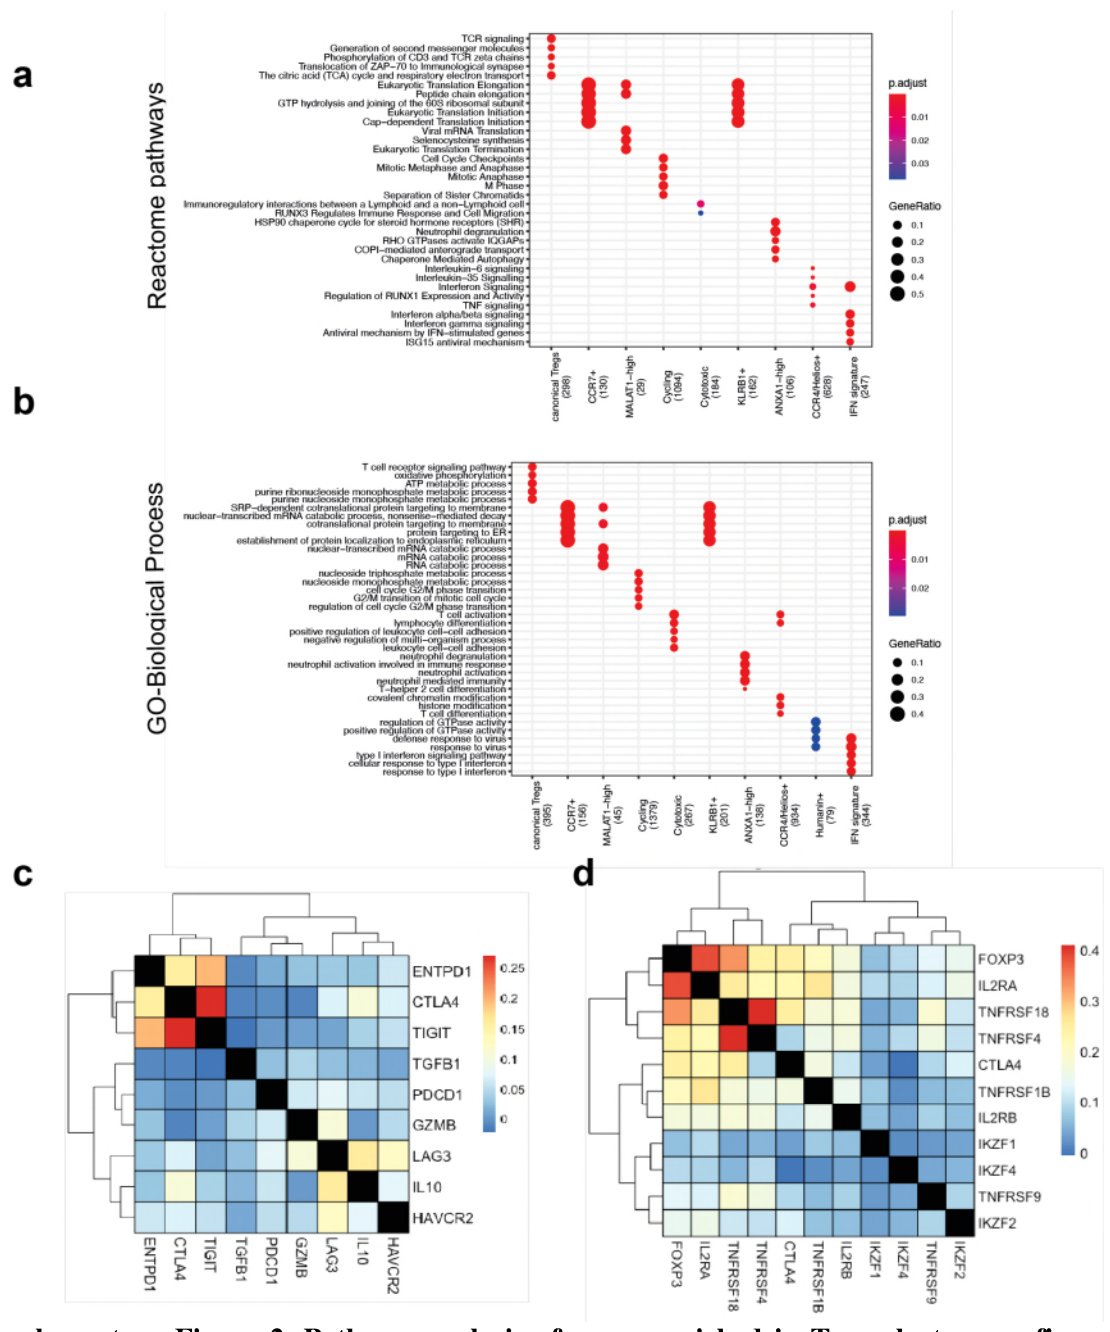

**Supplementary Figure 2. Pathway analysis of genes enriched in Treg clusters confirms an interferon-responsive signature cluster; co-expression of key co-inhibitory lineage and transcription factors. a and b.** Pathway analysis of upregulated genes in each cluster classified by Reactome (**a**) or GO terms Biological Processes (**b**). The color shows the p-value (after Benjamini-Hochberg correction) and the dot size (GeneRatio) represents the overlap between the number of genes upregulated in the cluster and the genes associated with each GO and Reactome term. **c-d** Gene correlation heat maps for selected Treg co-inhibitory molecules (**c**) and Treg lineage markers and transcription factors (**d**). Gene co-expression colored by Spearman's rank correlation coefficient.

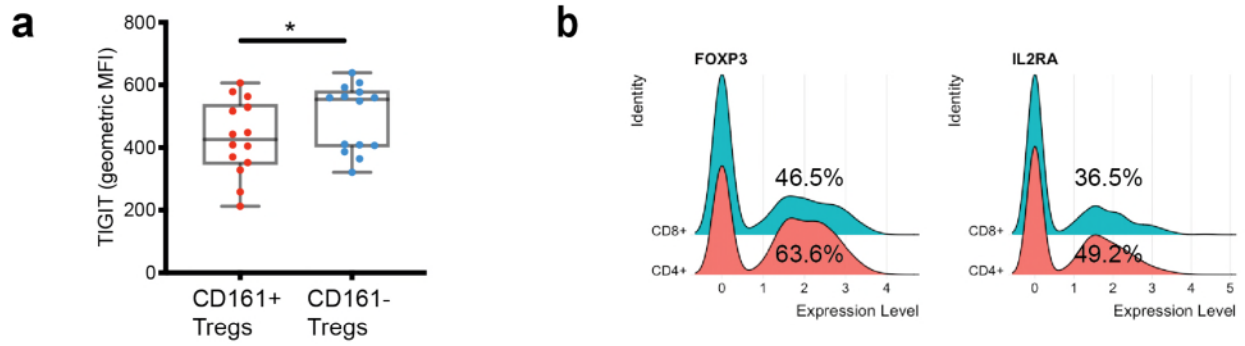

**Supplementary Figure 3. Th17-like Tregs are more often TIGIT<sup>low</sup>, and C8+ Tregs express *FOXP3* and *IL2RA* at levels comparable to CD4+ Tregs.**

**(a)** TIGIT expression (geometric mean of fluorescence intensity) in Tregs from 14 SpA PBMCs (gated on CD4<sup>+</sup> CD25<sup>+</sup> CD127<sup>low</sup>). Box plots show mean and standard error. **(b)** Ridge plots showing normalized expression of *FOXP3* and *IL2RA* in CD4<sup>+</sup> and CD8<sup>+</sup> Tregs (AS scRNAseq dataset).

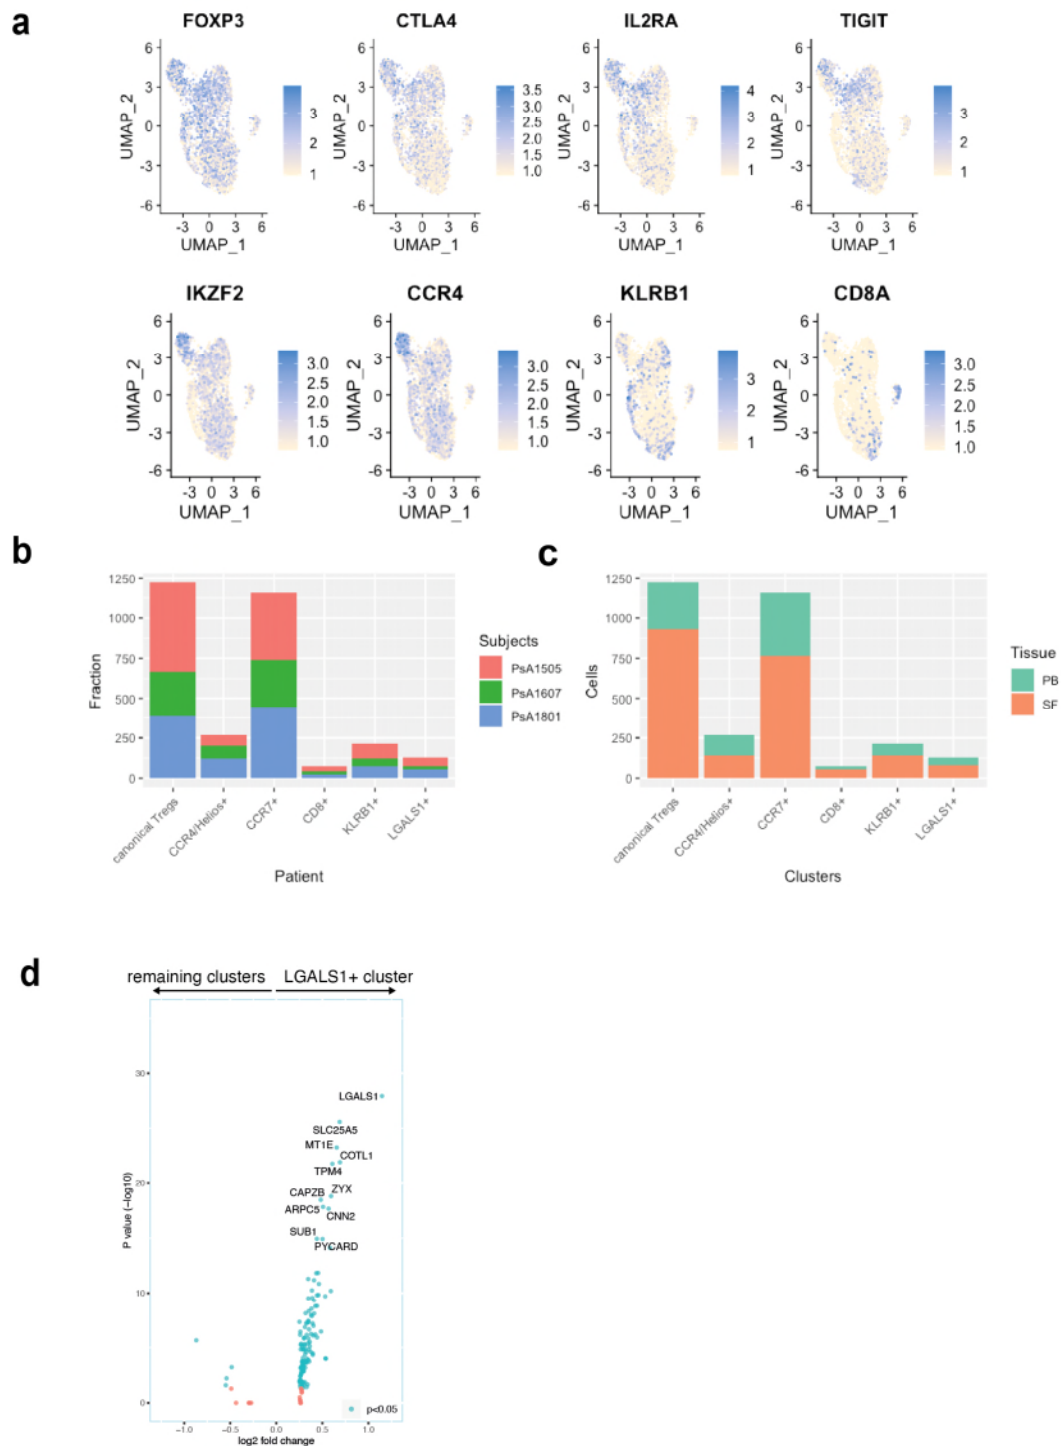

**Supplementary Figure 4. Single cell analysis of PsA Tregs confirms cluster identities found in AS. (a)** Expression plot of selected genes over the PsA UMAP plot assisting cluster annotation. **(b-c)** Contribution to PsA Treg clusters by patients and by tissue of origin. **(d)** Volcano plot showing genes differentially expressed in the LGALS1+ cluster compared to the rest of PsA Tregs. Blue dots indicate  $p < 0.05$ , Wilcoxon Rank Sum test with Bonferroni correction.

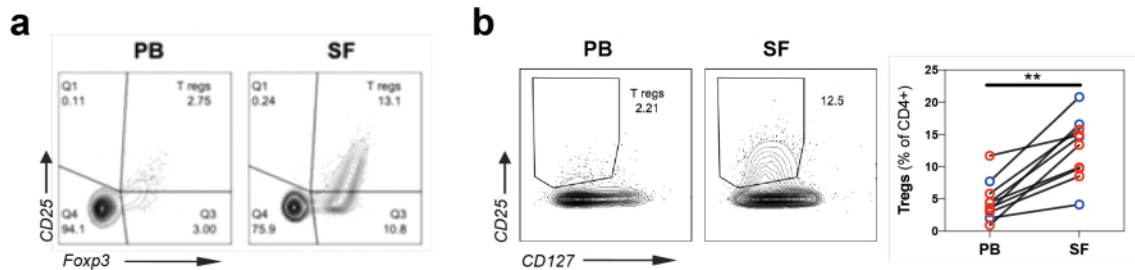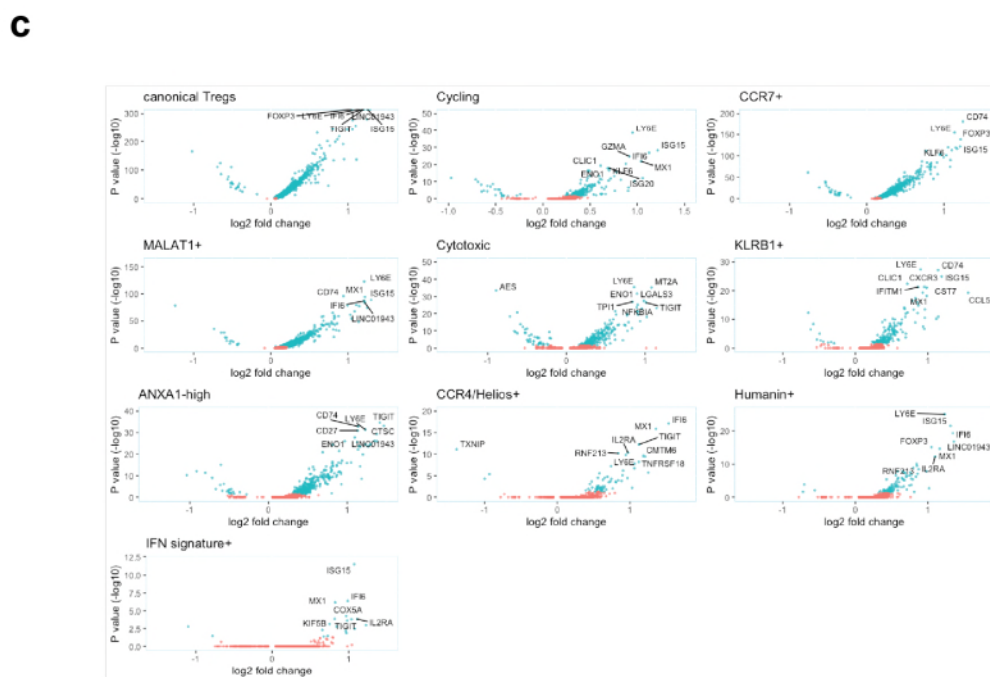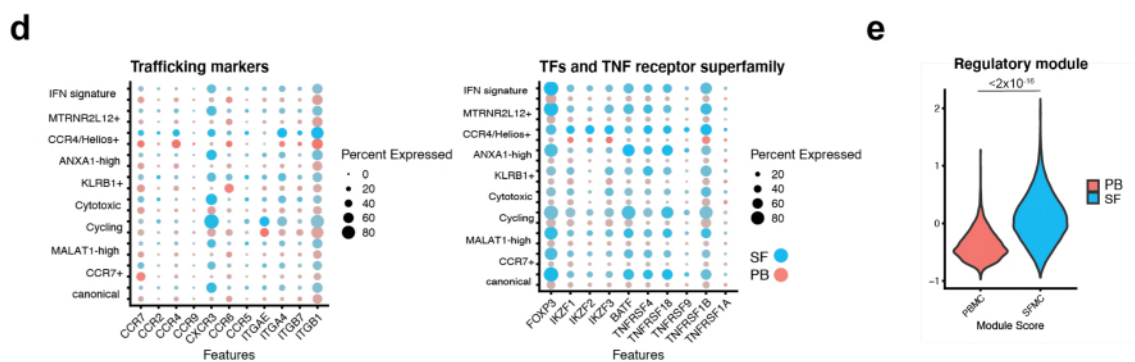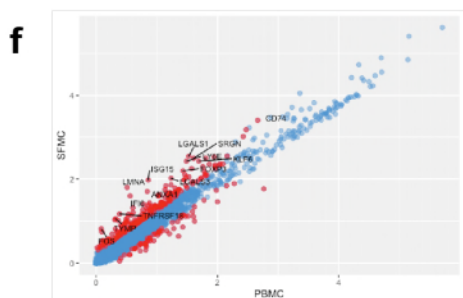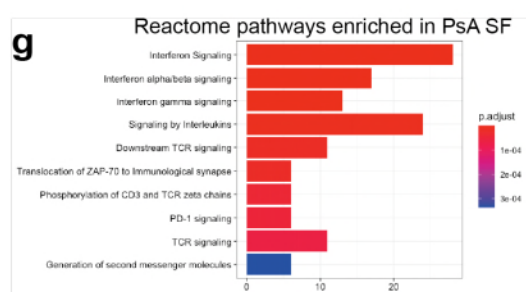

**Supplementary Figure 5. Tregs are increased in frequency in SpA synovial fluid and show specific gene expression changes.**

(a) Representative flow cytometry plot showing CD25 and Foxp3 of CD4+ PB and SF. (b) Representative flow cytometry (left panels) and summary data (right panel) showing CD25+ CD127low Tregs from paired SpA PB and SF (gated on CD4+) in PB and SF (n=8, blue dots: AS, red dots: PsA) (right panel). \*\* p 0.01 (paired t-test). (c) Comparison of AS SF and blood (PB) differential gene expression (scRNAseq) for each cluster. Blue plots p <0.05. (d) Dot plots showing expression of trafficking markers (left hand panel) and Treg-associated transcription factors and TNF receptor superfamily genes in AS PB (red) and SF (blue dots). (e) Regulatory Module Score (obtained from Treg core set in Zemmour *et al.* (9) in PB and SF Tregs (pairwise t-test). (f) Normalised logarithmic (log(UMI+1)) expression of all detected genes in PsA PB and SF. Red dots represent genes that are differentially expressed (Wilcoxon rank-sum test with Bonferroni correction). All genes detected in at least 5% of cells in each tissue are computed. (g) Genes upregulated in PsA SF compared to the PB grouped into the top 10 enriched Reactome categories. The color represents the p-value (after Benjamini-Hochberg correction) for each enriched Reactome term.

**a**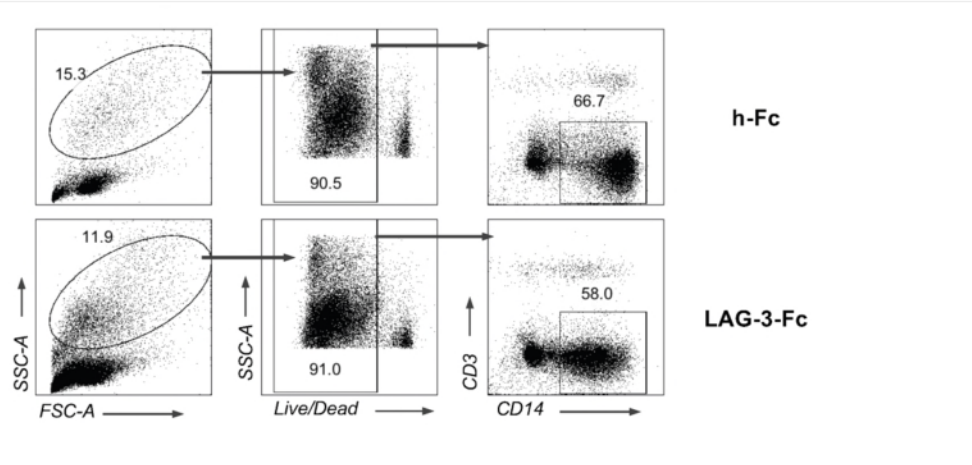**b**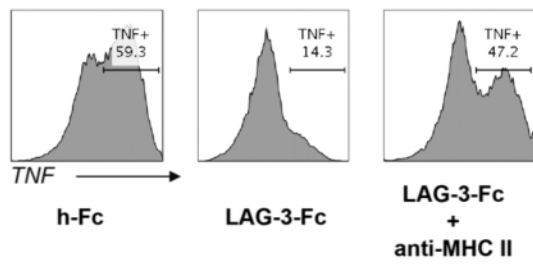**c**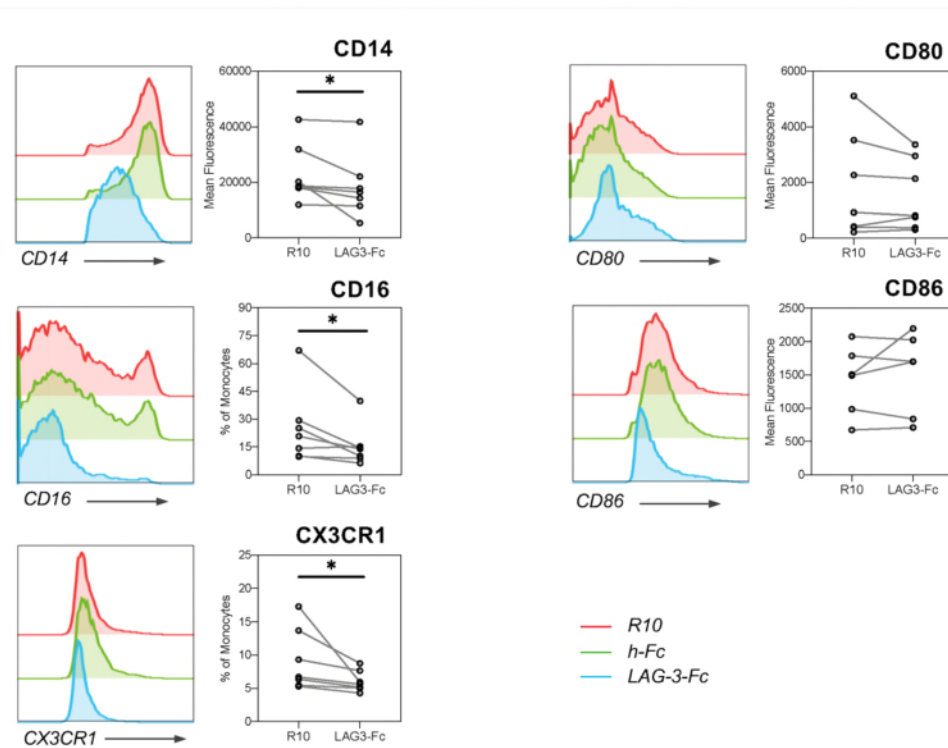

**Supplementary Figure 6. Soluble LAG-3 protein modifies monocyte phenotype downregulating selected activation and maturation markers.** (a) Gating strategy to identify monocytes within PBMCs assay. Downregulation of CD14 expression was observed in the presence of LAG3-Fc. (b) Expression of TNF on CD14+ monocytes after overnight culture with LPS and human Fc, LAG-3-Fc with and without blocking anti-MHC II (PBMCs from one AS patient). (c) Selected surface marker expression on monocytes (gated on CD3- CD14+) after overnight culture with LAG-3-Fc fusion protein. For markers with non bimodal distribution, geometric mean of fluorescence intensity was used. n=6 AS PBMC. hFc (human IgG1 Fc protein) was used as control in two of 6 experiments.



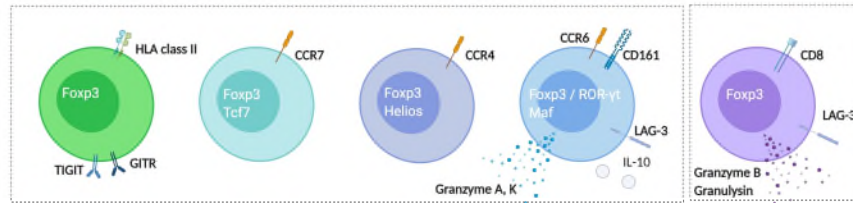

|                                  |                                                                                         |                                       |        |                              |                               |
|----------------------------------|-----------------------------------------------------------------------------------------|---------------------------------------|--------|------------------------------|-------------------------------|
| <i>Regulatory mechanism</i>      | TIGIT, CTLA-4, CD39                                                                     | (downregulated, naïve-like phenotype) | CTLA-4 | MAF/IL-10, LAG-3, Granzyme K | LAG-3, Granzyme B and K, PD-1 |
| <i>Markers</i>                   | CD25(hi), HLA-DR, CD27, GITR                                                            | CCR7                                  | CCR4   | CD161, CCR6, CD6             | CD8                           |
| <i>Treg core gene expression</i> | high                                                                                    | low                                   | high   | low                          | low                           |
| <i>Helios+</i>                   | +                                                                                       | -                                     | +      | --                           | +/-                           |
| <i>Synovial fluid changes</i>    | TNF receptor superfamily (GITR, TNF-RII), interferon response genes, FOXP3, TIGIT, CCL5 |                                       |        |                              |                               |

**Supplementary Figure 7. Graphical summary.** Distinct functional Treg populations are present in SpA blood and joints. Here shown the most abundant phenotypes identified by our analysis. Figure generated using Biorender.

| <i>Patient samples studied with scRNAseq</i>       |                 |         |                                   |             |                      |                        |                   |            |         |        |            |  |
|----------------------------------------------------|-----------------|---------|-----------------------------------|-------------|----------------------|------------------------|-------------------|------------|---------|--------|------------|--|
|                                                    | Age             | Sex     | Treatment                         | HLA-B27     | Peripheral arthritis | Skin psoriasis         | Axial involvement | Enthesitis | Colitis | BASDAI | CRP (mg/l) |  |
| <b>AS</b>                                          |                 |         |                                   |             |                      |                        |                   |            |         |        |            |  |
| AS01                                               | 41              | F       | NSAIDs                            | +           | +                    | -                      | +                 | +          | -       | 8.2    | 31/2       |  |
| AS02                                               | 73              | F       | NSAIDs                            | +           | +                    | +                      | +                 | -          | -       | N/A    | 15.0       |  |
| <b>PsA</b>                                         |                 |         |                                   |             |                      |                        |                   |            |         |        |            |  |
| PsA1505                                            | 35              | M       | NSAIDs                            | -           | +                    | +                      | -                 | -          | -       | N/A    | 11.7       |  |
| PsA1607                                            | 42              | M       | None                              | -           | +                    | +                      | -                 | -          | -       | N/A    | 8.0        |  |
| PsA1801                                            | 54              | F       | NSAIDs                            | -           | +                    | -                      | -                 | -          | -       | N/A    | 9.9        |  |
| <i>Patient samples studied with flow cytometry</i> |                 |         |                                   |             |                      |                        |                   |            |         |        |            |  |
| Diagnosis                                          | Age (Mean ± SD) | Sex (M) | Treatment                         | HLA-B27 (+) | BASDAI (mean) ± SD   | CRP (mg/l) (mean ± SD) |                   |            |         |        |            |  |
| PsA 5/8<br>AS 3/8                                  | 42.25 ± 12.07   | 4/8     | NSAIDs<br>TNFi (1/8)<br>MTX (1/8) | 4/8         | 6.4 ± 1.8 *          | 32.3 ± 53.3            |                   |            |         |        |            |  |

**Supplementary Table 1. Demographic and clinical characteristics of patients studied with scRNAseq and flow cytometry. \* available for AS patients only.**

*Antibodies used for characterisation of monocyte activation*

| Antibody       | Fluorochrome         | Clone   | Concentration | Manufacturer |
|----------------|----------------------|---------|---------------|--------------|
| CD14           | APC                  | M5E2    | 1/50          | Biolegend    |
| HLA-DR         | PerCP-Cy5.5          | L243    | 1/50          | Biolegend    |
| CD80           | Brilliant Violet 650 | 2D10    | 1/50          | Biolegend    |
| CD86           | FITC                 | BU63    | 1/50          | Biolegend    |
| CX3CR1         | PE                   | K0124E1 | 1/50          | Biolegend    |
| CD16           | PE/Cy7               | 3G8     | 1/50          | Biolegend    |
| CD40           | Brilliant Violet 421 | 5C3     | 1/50          | Biolegend    |
| IL-12/23 p40 * | PE                   | C8.6    | 1/100         | Thermofisher |
| TNF *          | Brilliant Violet 650 | MAb11   | 1/50          | Biolegend    |
| Viability Dye  | eFluor780            |         | 1/500         | Thermofisher |

*Antibodies for FACS sorting for single cell RNAseq*

| Antibody      | Fluorochrome | Clone  | Concentration | Manufacturer |
|---------------|--------------|--------|---------------|--------------|
| CD3           | PerCP-Cy5.5  | OKT3   | 1/50          | Biolegend    |
| CD4           | PE/Dazzle    | RPA-T4 | 1/50          | Biolegend    |
| CD8a          | PE           | RPA-T8 | 1/50          | Biolegend    |
| CD45RA        | PE/Dazzle    | HI100  | 1/50          | Biolegend    |
| CD25          | PE           | BC96   | 1/50          | Biolegend    |
| CD127         | PE/Cy7       | A019D5 | 1/50          | Biolegend    |
| Viability Dye | eFluor520    |        | 1/250         | Thermofisher |

*Antibodies used for Treg phenotyping*

| Antibody      | Fluorochrome         | Clone    | Concentration | Manufacturer |
|---------------|----------------------|----------|---------------|--------------|
| CD3           | Brilliant Violet 785 | OKT3     | 1/50          | Biolegend    |
| CD4           | APC                  | RPA-T4   | 1/50          | Biolegend    |
| CD25          | PE                   | BC96     | 1/50          | Biolegend    |
| CD127         | Brilliant Violet 605 | A019D5   | 1/50          | Biolegend    |
| Viability Dye | eFluor780            |          | 1/500         | Thermofisher |
| Foxp3 *       | Brilliant Violet 421 | PCH101   | 1/50          | Invitrogen   |
| CD45RA        | PerCP/Cy5.5          | HI100    | 1/50          | Biolegend    |
| CTLA-4 *      | APC                  | L3D10    | 1/50          | Biolegend    |
| LAG-3         | PE                   | FAB2319P | 1/50          | R&D          |
| Granzyme B *  | Pe/Dazzle            | QA1602   | 1/50          | Biolegend    |
| Granzyme K *  | FITC                 | 24C3     | 1/50          | ImmunoTools  |
| CD161         | FITC                 | HP-3G10  | Jan-50        | Biolegend    |

**Supplementary Table 2. Flow cytometry antibodies used.** \* antibody used in intracellular staining mix.

| Run | Patient   | Number of cells | Number of reads (millions) | Mean reads per cell | Median UMI counts per cells | Median genes per cell | Sequencing saturation | Antibody mean reads per cell |
|-----|-----------|-----------------|----------------------------|---------------------|-----------------------------|-----------------------|-----------------------|------------------------------|
| 1   | AS01 PBMC | 16507           | 512.6                      | 31055               | 3274                        | 1062                  | 74.90%                | 4946                         |
|     | AS01 SFMC | 18094           | 501.4                      | 27710               | 3072                        | 1212                  | 68.20%                | 4309                         |
| 2   | AS02 PBMC | 7959            | 340.5                      | 42789               | 2733                        | 1006                  | 86.40%                | 5201                         |
|     | AS02 SFMC | 16130           | 584.8                      | 36257               | 3188                        | 1250                  | 79.70%                | 3806                         |

**Supplementary Table 3. Summary metrics of the two 10x Chromium sequencing runs for the AS samples.** Parameters are calculated by the Cell Ranger automated analysis and refer to 5' gene expression and hashing (“antibody reads”).

| Treg gene core set (ref 9)                                                                | Th17 gene set                                                                             |
|-------------------------------------------------------------------------------------------|-------------------------------------------------------------------------------------------|
| "IL2RA", "IL2RB", "FOXP3", "CTLA4", "IKZF2", "TNFRSF4", "TNFRSF18", "TNFRSF9", "TNFRSF1B" | "RORC", "KLRB1", "CCR6", "IL10", "IL1R1", "IL23R", "MAF", "IL17A", "IL17F", "IL22", "AHR" |

**Supplementary Table 4. Gene lists used to calculate Module Score for each cluster.**
