# Supplementary material for: Single cell analysis of spondyloarthritis regulatory T cells identifies distinct synovial gene expression patterns and clonal fates
Source: PubMed Central journal article supplement (PMC8671562; doi:10.1038/s42003-021-02931-3), 2021-12-14
Supplement: 42003_2021_2931_MOESM2_ESM.pdf [file 42003_2021_2931_MOESM2_ESM.pdf]

## Description of Additional Supplementary Files

**File name:** Supplementary Data 1.

**Description:** AS Differentially expressed genes by cluster.

**File name:** Supplementary Data 2.

**Description:** AS Synovial fluid differentially expressed genes.

**File name:** Supplementary Data 3.

**Description:** PsA Differentially expressed genes by cluster.

**File name:** Supplementary Data 4.

**Description:** SpA (integrated AS/PsA) differentially expressed genes by cluster.

**File name:** Supplementary Data 5.

**Description:** Enriched AS TCR clones.

**File name:** Supplementary Data 6.

**Description:** Enriched PsA TCR clone.

**File name:** Supplementary Data 7.

**Description:** Differentially expressed genes in top 5 synovial fluid clonotypes vs non clonal synovial fluid.

**File name:** Supplementary Data 8.

**Description:** LAG-3-mediated monocyte inhibition.

**File name:** Supplementary Data 9.

**Description:** Source data to generate figures 1c-d, 2c, 2h, 4b, 5d, 5g, 6c, and 6f.
